# Supplementary material for: Interleukin-6, tumor necrosis factor-alpha and receptor activator of nuclear factor kappa ligand are elevated in hypertrophic gastric mucosa of pachydermoperiostosis
Source: PubMed Central journal article supplement (PMC5574921; doi:10.1038/s41598-017-09671-7), 2017-08-29
Supplement: 41598_2017_9671_MOESM1_ESM.pdf [file 41598_2017_9671_MOESM1_ESM.pdf]

**Title: Interleukin-6, tumor necrosis factor-alpha and receptor activator of nuclear factor kappa ligand are elevated in hypertrophic gastric mucosa of pachydermoperiostosis**

Hui Huang<sup>1,2</sup>, Yongjun Wang<sup>2</sup>, Yong Cao<sup>3</sup>, Boda Wu<sup>1,2</sup>, Yonggui Li<sup>1,2</sup>,  
Liangliang Fan<sup>4</sup>, Zhiping Tan<sup>4</sup>, Yi Jiang<sup>5</sup>, Jianguang Tang<sup>6</sup>,  
Jianzhong Hu<sup>3\*</sup>, Xiaoliu Shi<sup>1,2\*</sup>

<sup>1</sup>Department of Medical Genetics, The Second Xiangya Hospital, Central South University, Changsha, Hunan410011, China;

<sup>2</sup>Department of Gastroenterology, The Second Xiangya Hospital, Central South University, Changsha, Hunan410011, China;

<sup>3</sup>Department of Spine Surgery, Xiangya Hospital, Central South University, Changsha, Hunan 410008, China;

<sup>4</sup> The Thoracic Surgery Research Room, The Second Xiangya Hospital, Central South University, Changsha, Hunan410011, China;

<sup>5</sup>Department of Pathology, The Second Xiangya Hospital, Central South University, Changsha, Hunan410011, China;

<sup>6</sup>Department of Neurology, The Second Xiangya Hospital, Central South University, Changsha, Hunan410011, China.

\* These authors contributed equally to the paper.

Corresponding author: Xiaoliu Shi, room1308, science building, The Second Xiangya Hospital, Central South University, No.139,

Renmin Middle Road, Furong District, Changsha, Hunan410011,  
P.R. China. Phone: +86 731 85292206, Fax: +86 731 85292205,  
e-mail: shixl6@csu.edu.cn.

Co-corresponding author: Jianzhong Hu. Department of Spine  
Surgery, Xiangya Hospital, Central South University, Changsha,  
410008, Hunan, P.R. China; Phone: +86-731-84327327, Fax:  
+86-731-84327332, email: jianzhonghu@hotmail.com.

## Supplementary Legends

**Fig S1. The symbolic manifestations of patients with pachydermoperiostosis.**

PDP patients with thickening and furrowing facial features (a), periosteal thickness (white arrows) (b), severely swollen knee joints (c), typical digital clubbing (d), and acroosteolysis (black arrows) (e). a and b were from patient2. c was from patient4. d and e were from patient8.

**Fig S2. Comparison of IOD in gastric mucosa of PDP patients and controls.**

IOD, integrated optical density. SPSS13.0 software was employed. Data which were normally distributed were expressed as mean  $\pm$  standard error of the mean (S.E.M.). Statistical evaluation was performed using Mann - Whitney U-test to differentiate non-parametric means of different groups. IOD of IL-6, TNF $\alpha$  and RANKL expressions in gastric mucosa of PDP patients (n=8) were statistically higher than that in the controls (n=4) (\*  $p < 0.05$ , \*\*  $p < 0.01$ ).

**Table S1. The primers of coding regions in *SLCO2A1* and *HPGD*.**

**Table S2. Comparison of IOD in gastric mucosa of patient2 and patient3 before/after treatment.**

IOD, integrated optical density. Data were expressed as mean  $\pm$  standard error of the mean (S.E.M.). IOD in gastric mucosa of patients declined after them receiving the celecoxib treatment.

**Table S3. Damaging effects of variants detected in pachydermoperiostosis patients predicted by online software.**

P, patient. N, the variant has been reported. Y, the variant is reported by us for the first time. WT, wild type.

1. Zhang, Z, He, J.W, Fu, W.Z et al. *Mutations in the SLCO2A1 gene and primary hypertrophic osteoarthropathy: a clinical and biochemical characterization*. J Clin Endocrinol Metab, 2013. **98**(5): p. 923-33.
2. Niizeki, H, Shiohama, A, Sasaki, T et al. *The novel SLCO2A1 heterozygous missense mutation p.E427K and nonsense mutation p.R603\* in a female patient with pachydermoperiostosis with an atypical phenotype*. Br J Dermatol, 2014. **170**(5): p. 1187-9.
3. Diggle CP, Parry DA, Logan CV et al. *Prostaglandin transporter mutations cause pachydermoperiostosis with myelofibrosis*. Hum Mutat, 2012. **33**(8): p. 1175-81.
4. Zhang, Z, He, J.W, Fu, W.Z et al. *A novel mutation in the SLCO2A1 gene in a Chinese family with primary hypertrophic osteoarthropathy*. Gene, 2013. **521**(1): p. 191-4.
5. Erken, E, Koroglu, C, Yildiz, F et al. *A novel recessive 15-hydroxyprostaglandin dehydrogenase mutation in a family with primary hypertrophic osteoarthropathy*. Mod Rheumatol, 2015. **25**(2): p. 315-21.

Figure S1

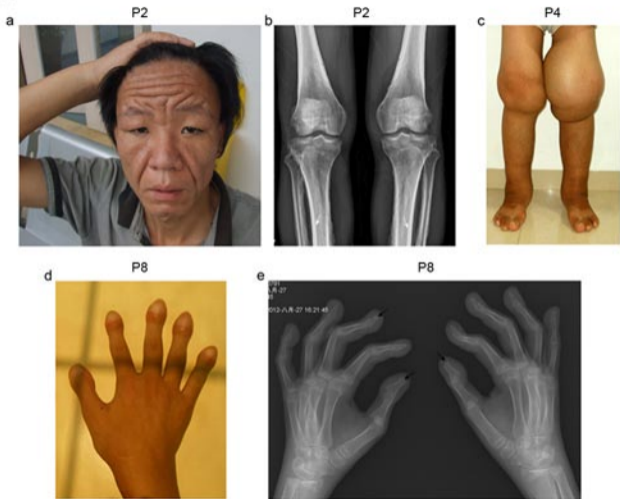

Figure S2

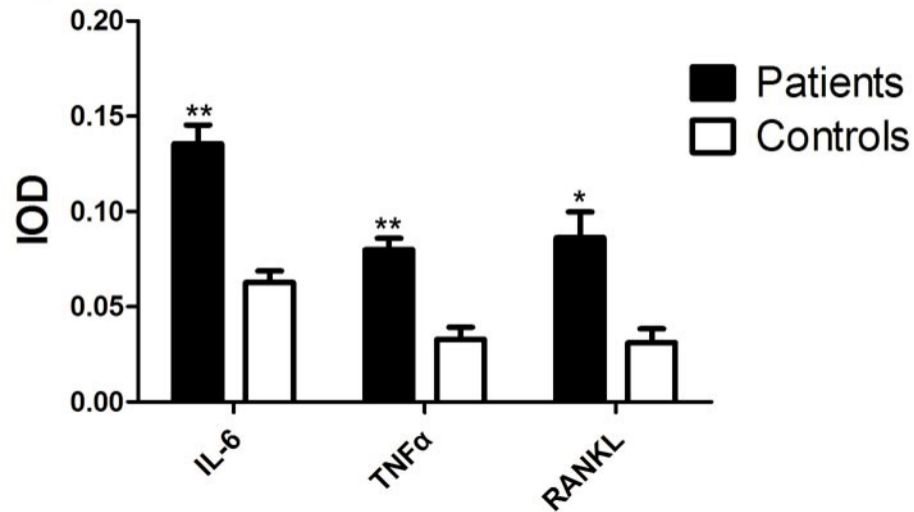

TableS1. The primers of coding regions in *SLCO2A1* and *HPGD*.

| Target                | Forward primer sequence(5'-3') | Reward primer sequence(3'-5') |
|-----------------------|--------------------------------|-------------------------------|
| <i>SLCO2A1</i> exon1  | gaatctcctccggccact             | ggctccggcagacagaag            |
| <i>SLCO2A1</i> exon2  | cactgggccacatatcacag           | ctgttaccggcagaaagag           |
| <i>SLCO2A1</i> exon3  | ggagatggagaccagaagg            | gcacacttctgaacaaacc           |
| <i>SLCO2A1</i> exon4  | caggaaccatgtcccattg            | acacagctgggaggtaatgg          |
| <i>SLCO2A1</i> exon5  | acaggtgtgggcttatcagg           | cagcagctgttcctcacag           |
| <i>SLCO2A1</i> exon6  | cctctgggaagaccaatagc           | tggaggtctcctgatcctg           |
| <i>SLCO2A1</i> exon7  | ggaatgcaggtgctgtttg            | tctgctcctactgtcccttac         |
| <i>SLCO2A1</i> exon8  | ccctgtggtgtgtgtgc              | ctgactggaaggacaggag           |
| <i>SLCO2A1</i> exon9  | gcttgcaagcagtaaattg            | tgctgaacctgggagaatc           |
| <i>SLCO2A1</i> exon10 | aatggagagatgccgtgac            | cccagggtaggaggtagag           |
| <i>SLCO2A1</i> exon11 | ttgccaaacagtgcacagag           | cctgcaatgaggagctcag           |
| <i>SLCO2A1</i> exon12 | tagagcattcagcccaggtg           | cctcaagcaatctgggaaac          |
| <i>SLCO2A1</i> exon13 | gcccgtgtatctccactctg           | tggccctcatgttctcttc           |
| <i>SLCO2A1</i> exon14 | cctgctccctacagctttg            | gggtacacagtggcccttag          |
| <i>HPGD</i> exon1     | gctggcttgacagtttctc            | agtctcggagtgtgtgggc           |
| <i>HPGD</i> exon2     | gtgtgtttattgtttgccgtc          | acgttcccagttgacagattg         |
| <i>HPGD</i> exon3     | cctctcatggcataggacatg          | gtttccatgactccaagaacc         |
| <i>HPGD</i> exon4     | gtattcctttctcacttatgc          | tgaagattgttttgggtcc           |
| <i>HPGD</i> exon5     | gagtttcacaaagctatctgg          | tgagatatgacggtgtgtgtag        |
| <i>HPGD</i> exon6     | gaaactgctgaaacctacaac          | ctgtataagcttatttctccc         |
| <i>HPGD</i> exon7     | cacatttcctataacatgttc          | agctatggctaacacataagc         |

**Table S2. Comparison of IOD in gastric mucosa of patient2 and patient3 before/after treatment.**

|          |          | IOD (Integrated Optical Density) |                     |                     |                     |                     |                     |
|----------|----------|----------------------------------|---------------------|---------------------|---------------------|---------------------|---------------------|
|          |          | IL-6                             |                     | TNF $\alpha$        |                     | RANKL               |                     |
|          |          | Before treatment                 | After treatment     | Before treatment    | After treatment     | Before treatment    | After treatment     |
| Patients | patient2 | 0.1642 $\pm$ 0.0459              | 0.0646 $\pm$ 0.0104 | 0.0989 $\pm$ 0.0166 | 0.0088 $\pm$ 0.001  | 0.1565 $\pm$ 0.0008 | 0.0195 $\pm$ 0.0017 |
|          | patient3 | 0.1279 $\pm$ 0.0328              | 0.0634 $\pm$ 0.0136 | 0.0639 $\pm$ 0.0158 | 0.0227 $\pm$ 0.0110 | 0.0929 $\pm$ 0.0279 | 0.0334 $\pm$ 0.0119 |



**TableS3.Damaging effects of variants detected in pachydermoperiostosis patients predicted by online soft wares.**

| Family | Gene           | Patient          | Genotype        | Protein     | Novel | Mutation taster                  | Polyphen2                        | SIFT                  | HSF                     |
|--------|----------------|------------------|-----------------|-------------|-------|----------------------------------|----------------------------------|-----------------------|-------------------------|
| 1      | <i>SLCO2A1</i> | P1( Fig1 a II-2) | c.1106G>A       | p.G369D     | N[1]  | Disease causing (Score > 0.9999) | Probably Damaging ( Score:1.000) | Damaging ( Score:0)   | -                       |
|        |                | P2( Fig1 a II-4) | c.1106G>A       | p.G369D     | N     | Disease causing (Score > 0.9999) | Probably Damaging ( Score:1.000) | Damaging ( Score:0)   | -                       |
| 2      | <i>SLCO2A1</i> | P3(Fig1 b II-2)  | c.1106G>A       | p.G369D     | N     | Disease causing (Score > 0.9999) | Probably Damaging ( Score:1.000) | Damaging ( Score:0)   | -                       |
|        |                |                  | c.1807C>T       | p.R603X     | N[2]  | Disease causing (Score:1)        | -                                | -                     | -                       |
| 3      | <i>SLCO2A1</i> | P4(Fig1 c II-1)  | c.941-1G>A      | p.?         | N[3]  | Disease causing (Score:1)        | -                                | -                     | Broken WT Acceptor Site |
|        |                |                  | c.1771C>T       | p.R591X     | Y     | Disease causing (Score:1)        | -                                | -                     | -                       |
| 4      | <i>SLCO2A1</i> | P5(Fig1 dII-1)   | c.1406C>T       | p.P469L     | Y     | Disease causing (Score > 0.9999) | Probably Damaging ( Score:1.000) | Damaging ( Score:0)   | -                       |
|        |                |                  | c.1602C>A       | p.N534K     | N[4]  | Disease causing (Score > 0.9999) | Probably Damaging ( Score:0.984) | Damaging (Score:0.04) | -                       |
| 5      | <i>SLCO2A1</i> | P6(Fig1 e II-1)  | c.611C>T        | p.S204L     | N[5]  | Disease causing (Score > 0.9999) | Probably Damaging ( Score:1.000) | Damaging ( Score:0)   | -                       |
| 6      | <i>SLCO2A1</i> | P7(Fig1 f II-4)  | c.96+4A>C       | p.?         | Y     | -                                | -                                | -                     | Broken WT Donor Site    |
|        |                |                  | c.1069T>C       | p.Y357H     | Y     | Disease causing (Score > 0.9999) | Probably Damaging ( Score:0.999) | Damaging ( Score:0)   | -                       |
| 7      | <i>HPGD</i>    | P8(Fig1 g II-1)  | c.310-311del CT | p.L104Afs*3 | N[5]  | Disease causing (Score:1)        | -                                | -                     | -                       |
